1 **Developing a primary *Paralichthys olivaceus* gill epithelial cells as an *in vitro* model for**  
2 **propagation of VHSV show a corresponding increase in cell viability with increase in**  
3 **protein concentration in growth media**

4

5 Sori Han<sup>1</sup>, Jimin Hong<sup>1</sup>, Jong-pyo Seo<sup>2</sup>, Hetron Mweemba Munang'andu<sup>3</sup>, In-kyu Yeo<sup>4\*</sup> and  
6 Sung-hyun Kim<sup>1\*</sup>

7 1- Fishcare, 21, Sehwa-ro 162 beon gil, Pyoseon-myeon, Seogwipo, Jeju, Korea

8 2- Hae-Yeon fishfarm, 866 Haemajihae-an-ro, Gujwa-eup, Jeju-si, Jeju, Korea

9 3- Norwegian University of Life Sciences, Faculty of Veterinary Medicine and Biosciences,

10 Department of Basic Sciences and Aquatic Medicine, Section of Aquatic Medicine and

11 Nutrition, Ullevalsveien 72, P.O. Box 0454, Dep NO-0033, Oslo, Norway

12 4 - Department of Marine life Science, Jeju National University, Jeju 63243, Korea

13 Corresponding author: 1. Sung-Hyun Kim (email: [sunghyun.kim@live.co.kr](mailto:sunghyun.kim@live.co.kr))

14 2. In-Kyu Yeo (email: [iky eo99@jejunu.ac.kr](mailto:iky eo99@jejunu.ac.kr))

15 **Abstract**

16 **Background:** Viral Hemorrhagic Septicemia Virus (VHSV) is a rhabdovirus that causes high  
17 mortalities linked to high economic losses in aquaculture. It has been grouped in four  
18 genotypes of which some do not easily propagate on continuous cell lines. As an alternative,  
19 the objectives of this study was to develop a primary gill epithelial cell (GEC) model from  
20 olive flounder (*Paralichthys olivaceus*) as an in vitro model for the propagation of VHSV.

21 **Results:** Our findings show that the primary GECs developed herein are highly permissive to  
22 replication of the JF-09 genotype IVa strain leading to high cytopathic effect observed within  
23 96 hours post virus inoculation. Our findings also show that the viability GECs produced  
24 herein corresponded with increase in the concentration fetal bovine serum in growth medium.  
25 We envision that GECs produced herein will heighten our understanding of immune  
26 mechanisms associated with virus entry on gill mucosal surfaces in flounder.

27

28 **Key words:** Gill epithelial cells; Olive flounder; Cytopathic effect; VHSV

## 29 **Introduction**

30 Primary epithelial cells are increasing being used to study host response to infection because  
31 they provide insights on host pathogen interactions at portal of virus entry on mucosal  
32 surfaces. They provide vital information on cellular properties associated with susceptibility  
33 such as surface receptors that bind viral epitopes linked to infection establishment as well as a  
34 key data on immunological responses at portals of virus entry. Contrary to permanent cell  
35 lines, primary cells maintain vital cellular properties that favor virus replication essential for  
36 bulk antigen production in vaccine development (Alge et al., 2006; Pan et al., 2009). Hence  
37 development of primary epithelial cells is important for diagnostic purposes as well as  
38 production of bulk antigens required for vaccine production.

39 Viral hemorrhagic septicemia virus (VHSV) is a -ssRNA *Novirhabdovirus* belonging to the  
40 family *Rhabdoviridae* (Ammayappa and Vakharia, 2009). In East Asia, VHS disease was first  
41 reported with mass mortality in olive flounder (*Paralichthys olivaceus*) in Japan in 1996. The  
42 virus was later found to be widely distributed in wild and farmed olive flounder in South  
43 Korea (Kim et al., 2009) causing high mortality linked to severe economic losses. It is  
44 divided in four genotypes (I-IV) with different sublineages (Tafalla et al., 2008; Tafalla et al.,  
45 1998) render primary gill epithelial cells (GECs) to be a better alternative. However, the  
46 majority of VHSV replication GECs have mostly been carried out using European and North  
47 America strains on rainbow trout (RBT) GECs. Brudeseth et al (Brudeseth et al., 2008)  
48 propagated the genotype-Ia from Denmark in RBT GECs while Pham et al (Pham et al.,  
49 2013) produced infectious progeny on RBT GECs from genotype IVb, which are North  
50 American VHSV strains. To our knowledge there are no studies carried out on GECs  
51 generated from Asian fish species. Hence, our objective was to develop primary GECs from  
52 olive flounder essential for evaluating VHSV infectivity *in vitro* as a reliable model to study  
53 innate immune responses in a primary barrier against VHSV infections (Kim et al., 2014).

## 54 **Materials and Methods**

### 55 **Fish examination**

56 Juvenile olive flounder (<15 g) were obtained from a farm in Jeju, South Korea. The body  
57 surface and gills were examined for signs of disease infection and deformities. Fish were  
58 examined for presence of bacterial pathogens by isolation on basic growth media such as a  
59 blood agar and brain heart agar (BHI). Given that *Edwardsiella* infection is endemic in Olive  
60 flounder on Jeju Island, fish were also screened for *Edwardsiella* infection based on the  
61 method described by Han et al. (Han et al., 2017). In addition, selective media such as

62 shigella salmonella agar and TCBS agar were used to Edwardsiella screening. Direct RT-PCR  
63 (HelixAmp<sup>tm</sup>) and Direct PCR (helixAmp<sup>tm</sup>) kit was used to screen for viruses like VHSV,  
64 red sea bream Iridovirus (RSIV), viral nervous necrosis virus (VNNV), marine birnavirus (M  
65 BV) and Hirame rhabdovirus (HRV) as described by (Cho et al., 2008). All fish used in the  
66 study had no viral and bacterial infection detected.

### 67 **Primary cell culture of gill epithelial cells**

68 Primary GECs were isolated and cultured using a protocol modified from Kim et al (Kim et  
69 al., 2014). First, gills were dissected and disinfected using antibiotics (Gentamicin, Gibco; 10  
70 mg/ml) and antifungal drugs (Amphotericin B, Gibco; 250 µg/ml). Blood clots in the gill  
71 filaments were removed, and the gills were trypsinized in 0.5% Trypsin-EDTA (Gibco) in a  
72 vortex for 15 min. Trypsin activity was stopped by adding 10% fetal bovine serum (FBS;  
73 Gibco) in phosphate-buffered saline (PBS). GECs were collected and seeded in cell culture  
74 flasks in Gibco Leibovitz's L-15 Medium (Gibco) containing 10% fetal bovine serum (FBS)  
75 and 1% of gentamicin (10 mg/ml). Thereafter, the flasks were incubated at 20°C for 24 hrs.  
76 After 24 hrs, the suspended particles and blood cells in the cell culture medium were removed  
77 by washing thrice using PBS. Cell culture medium was replaced every 3 - 4 day until virus  
78 infection. The cells were observed under a microscope after fixing with 10% (v/v)  
79 formaldehyde (in PBS) for 30 min at room temperature. Primary GECs were observed under  
80 the microscope at 24 hrs and 96 hrs post-seeding.

### 81 **MTT viability assay**

82 Cell viability was measured in CellTiter AQueous one solution (Promega, USA). To determine  
83 the optimal concentration of FBS required for GEC growth, FBS was constituted at 5%, 10%  
84 and 20% concentrations in L-15 medium having 1% gentamicin (10 mg/ml). Cells  
85 ( $1 \times 10^4$ /well) were seeded in 0.2 ml L-15 medium/well in 96-well plates. After removing the  
86 medium, each the three FBS concentrations was added to five wells. On days 3 and 7 after  
87 incubation at 20°C, 10 µl of CellTiter AQueous One solution was added to each well. The  
88 plates were incubated for 24 hrs in 20°C. Absorbance was measured at 540 nm using the  
89 EPOCH spectrophotometer (BioTek).

### 90 **Viral hemorrhagic septicemia virus infection of primary gill epithelial cells**

91 To determine the susceptibility of the olive flounder primary GECs to VHSV infection, first  
92 passage cells were seeded into 24-well plates at a concentration  $1 \times 10^5$  cells per well. When  
93 the cells were confluent after 96h post-seeding, they were infected by the wild type VHSV  
94 (JF-09 genotype IVa) previously isolated from olive flounder (Kim et al., 2014) at a

95 multiplicity of infection (MOI) of 1. Virus titration to determine the MOI was performed in  
96 *Epithelioma papulosum cyprinid* (EPC) cells using the 50% tissue culture infective dose  
97 (TCID<sub>50</sub>/ml) method previously described by Spearman - Karber method. After infection, the  
98 GECs were incubated at 20°C for 96 hrs. Cytopathic effect (CPE) was confirmed by  
99 microscopy after fixing the cells with 10% (v/v) formaldehyde in PBS for 30 min at room  
100 temperature.

101 To determine virus propagation in the olive flounder primary GECs, cells were seeded  
102 ( $1 \times 10^4$ ) in 96-well plates. When CPE appeared after VHSV inoculation, the supernatant was  
103 collected for VHSV verification by PCR. Reverse transcription (RT) was performed using  
104 Direct RT-PCR kit (HelixAmp™) according to the manufacturer's instruction. VGsense (5'-  
105 CCAGCTCAACTCAGGTGTCC-3') and VGanti (5'-GTCACYGTGCATGCCATTGT3')  
106 primers were used for amplification of a 587 base region of the VHSV G gene (Nishizawa et  
107 al., 2002). 5 µl of sample and D.W. up to total 50 µl were added to RT-PCR reaction mix.  
108 PCR conditions were as follows; Pre-denaturation 95°C for 5 min, 40 cycles (94°C for 20 s,  
109 52°C for s, and 72°C for 1 min) and post extension 72°C for 5 min. PCR products were  
110 subjected to electrophoresis using 1.0% agarose gels containing RedSafe™ (iNtRon). They  
111 were visualized under UV light to detect the difference of virus concentration between the  
112 inoculated VHSV stock (post-infection 0hrs) and the supernatant of the well at post-infection  
113 96hrs with band thickness.

## 114 **Results and Discussion**

### 115 **Primary Gill epithelial cells**

116 Figure 1A shows partial confluence of primary olive flounder GECs attained after incubation  
117 at 20°C for 24 hrs. The cells appeared healthy and adherent to the base of the cell-culture  
118 flasks. Figure 1B shows results of the MTT viability analysis in which the quantity of live  
119 cells corresponded with increase in the concentration of FBS added to the growth media as  
120 shown from the samples collected at 72 hrs and 168 hrs post seeding. Overall, the quantity of  
121 live cells was highest in 20% FBS at 72 hrs and 168 hrs post seeding being more than twice  
122 the number of viable cells observed in cells seeded with 5% FBS at 72 hrs and 168hrs post-  
123 seeding.

### 124 **Virus infection**

125 Figure 2B shows that Olive flounder GECs generated in this study were permissive to VHSV  
126 replication as shown from CPE produced at 96 hrs and 120 hrs post virus inoculation. On the  
127 contrary, there was no CPE observed in the none-infected cells as shown in Figure 2A. Figure

128 3 shows detection of VHSV strain JF-09 genotype IVa infection by PCR. Note the detection  
129 of PCR products from GEC supernatants collected at 96 hrs post-infection shown by presence  
130 of positive bands in lanes 1, 2 and 3 that corresponded with detection of the VHSV in the  
131 positive control sample shown in lane P. On the other hand, there were no VHSV bands  
132 detected from uninfected GECs as shown in lanes 0<sub>1</sub>, 0<sub>2</sub> and 0<sub>3</sub> as well as the negative control  
133 distilled water (DW) in lane C. Put together, these findings demonstrate that the Olive  
134 flounder primary GECs developed in this study are permissive to VHSV strain JF-09  
135 genotype IVa infection leading to production of CPE confirmed by PCR diagnosis.

136 Our findings are in line with studies carried out on RBT GECs (*Oncorhynchus mykiss*). Pham  
137 et al (Pham et al., 2013) showed that RBT gill epithelial cells were more susceptible to VHSV  
138 infection than spleen macrophages from because they led to rapid growth rate, higher CPE  
139 and virus yield. Tafalla et al (Tafalla et al., 2008) showed that VHSV was not able to  
140 complete its replication cycle in monocyte/macrophage-like cell line RTS11 and, hence, it  
141 failed to produce infectious viral particles. They attributed inhibition of the virus replication  
142 to high IFN and Mx expression by RTS11 cells. In another study, Tafalla et al (Tafalla et al.,  
143 1998) showed that VHSV infected trout and turbot head kidney macrophages as well as blood  
144 leukocytes primary cultures, but failed to produce CPE. Brudeseth et al (Brudeseth et al.,  
145 2008) showed that the virulent VHSV strain propagated on RBT GECs caused high CPE and  
146 translocated into neighboring cells within 2 h post inoculation (dpi) and yet on primary head  
147 kidney cells it only produced 9.5% maximum infectivity 3 dpi. Several studies have shown  
148 that cell-lines of lymphoid origin like macrophages and monocytes with high IFN expression  
149 inhibit the growth VHSV. Although we did not examine the IFN expression levels in this  
150 study, the general observation is that GECs are low IFN producers compared to macrophages  
151 and monocytes thus make good candidates for VHSV propagation. Hence, the approach used  
152 in this study would aid in diagnosis and vaccine development.

153 Hence, in the present study we inoculated the JF-09 genotype IVa on primary GECs  
154 generated from olive flounder resulting in a high replication rate and CPE formation within  
155 72 h after inoculation clearly showing that the olive flounder primary GECs are highly  
156 permissive to rapid propagation of the JF-09 genotype IVa strain. Hence, in situation where  
157 rainbow trout are not available for preparation of GECs, olive flounder can be used to prepare  
158 GECs for the rapid propagation of VHSV with the view to obtain high virus yield using the  
159 approach used in this study. Moreover, our findings show that 20% FBS gives high cell  
160 viability than 5% and 10% indicating the method can be optimized to increase cell viability  
161 during propagation up to 168 hrs (1-week) post seeding. We envision that these findings shall

162 contribute to development of diagnostic tools and vaccine production against VHSV strains  
163 infecting olive flounder and other fish species.

#### 164 **Acknowledgements**

165 We thank for all participants in this study

#### 166 **Competing interests**

167 The authors declare no competing or financial interests.

#### 168 **Author contributions**

169 Conceptualization: S.K., I.Y.; Methodology: S.K., S.H.; Formal analysis: S.H.; Investigation:  
170 S.H.; Resources: S.H., J.S., S.K.; Data curation: J.H.; Writing - original draft: J.H., S.H.,  
171 S.K., I.Y.; Writing - review & editing: S.K., J.S., I.Y., H.M.M.; Supervision: S.K., H.M.M.,  
172 I.Y.; Project administration: S.H., S.K.

#### 173 **Funding**

174 This work was supported by Korea Institute of Planning and Evaluation for Technology in  
175 Food, Agriculture and Forestry (IPET) through Golden Seed Project, funded by Ministry of  
176 Agriculture, Food and Rural Affairs (MAFRA). (213008-05-2-SB220).

## 177 **References**

- 178 Alge, C.S., Hauck, S.M., Priglinger, S.G., Kampik, A. and Ueffing, M. (2006). Differential  
179 protein profiling of primary versus immortalized human RPE cells identifies expression  
180 patterns associated with cytoskeletal remodeling and cell survival. *J Proteome Res.* **5**(4), 862-  
181 878.
- 182 Ammayappan, A. and Vakharia, V.N. (2009). Molecular characterization of the Great Lakes  
183 viral hemorrhagic septicemia virus (VHSV) isolate from USA. *Virology J.* **6**(1), 171.
- 184 Brudeseth, B.E., Skall, H.F. and Evensen, Ø. (2008). Differences in virulence of marine and  
185 freshwater isolates of viral hemorrhagic septicemia virus in vivo correlate with in vitro ability  
186 to infect gill epithelial cells and macrophages of rainbow trout (*Oncorhynchus mykiss*). *J.*  
187 *Virol.* **82**(21), 10359-10365.
- 188 Cho, M.Y., Kim, M.S., Choi, H.S., Park, G.H., Kim, J.W., Park, M.S. and Park, M.A. (2008).  
189 A statistical study on infectious diseases of cultured olive flounder, *Paralichthys olivaceus* in  
190 Korea. *J. Fish Pathol.*, **21**, 271-278.
- 191 Einer-Jensen, K., Winton, J. and Lorenzen, N. (2005). Genotyping of the fish rhabdovirus,  
192 viral haemorrhagic septicaemia virus, by restriction fragment length  
193 polymorphisms. *Veterinary microbiology* **106**(3-4), 167-178.
- 194 Han, S.-R., Han, H.-S., Evensen, Ø. and Kim, S.-H. (2017). PCR-based identification of  
195 *Pseudomonas fluorescens* in diseased olive flounder, *Paralichthys olivaceus*, in Jeju Island,  
196 South Korea. *J. Fish Pathol.* **30**(1), 67-70.
- 197 Kim, S.H., Thu, B.J., Skall, H.F., Vendramin, N. and Evensen, Ø. (2014). A single amino acid  
198 mutation (I1012F) of the RNA polymerase of marine viral hemorrhagic septicemia virus  
199 changes in vitro virulence to rainbow trout gill epithelial cells. *J. Virol.* **88**(13), 7189-7198.
- 200 Kim, W.-S., Kim, S.-R., Kim, D., Kim, J.-O., Park, M.-A., Kitamura, S.-I., Kim, H.-Y., Kim,  
201 D.-H., Han, H.-J. and Jung, S.-J. (2009). An outbreak of VHSV (viral hemorrhagic septicemia  
202 virus) infection in farmed olive flounder *Paralichthys olivaceus* in Korea. *Aquaculture* **296**(1-  
203 2), 165-168.
- 204 Einer-Jensen, K., Ahrens, P., Forsberg, R. and Lorenzen, N. (2004). Evolution of the fish  
205 rhabdovirus viral haemorrhagic septicaemia virus. *J. Gen. Virol.* **85**(5), 1167-1179.
- 206 Nishizawa, T., Iida, H., Takano, R., Isshiki, T., Nakajima, K. and Muroga, K. (2002). Genetic  
207 relatedness among Japanese, American and European isolates of viral hemorrhagic  
208 septicemia virus (VHSV) based on partial G and P genes. *Diseases of Aquatic Organisms*  
209 **48**(2), 143-148.
- 210 Pan, C., Kumar, C., Bohl, S., Klingmueller, U. and Mann, M. (2009). Comparative proteomic



211 phenotyping of cell lines and primary cells to assess preservation of cell type-specific  
212 functions. *Mol. Cell. Proteom.* **8**(3), 443-450.

213 Pham, P.H., Lumsden, J.S., Tafalla, C., Dixon, B. and Bols, N.C. (2013). Differential effects  
214 of viral hemorrhagic septicaemia virus (VHSV) genotypes IVa and IVb on gill epithelial and  
215 spleen macrophage cell lines from rainbow trout (*Oncorhynchus mykiss*). *Fish & shellfish*  
216 *immunology* **34**(2), 632-640.

217 Tafalla, C., Figueras, A. and Novoa, B. (1998). In vitro interaction of viral haemorrhagic  
218 septicaemia virus and leukocytes from trout (*Oncorhynchus mykiss*) and turbot  
219 (*Scophthalmus maximus*). *Vet. Immunol. Immunopathol.* **62**(4), 359-366.

220 Tafalla, C., Sanchez, E., Lorenzen, N., DeWitte-Orr, S.J. and Bols, N.C. (2008). Effects of  
221 viral hemorrhagic septicemia virus (VHSV) on the rainbow trout (*Oncorhynchus mykiss*)  
222 monocyte cell line RTS-11. *Molecular immunology* **45**(5), 1439-1448.

223 **Figure legends**

224 **1.**

225 **A**

**B**

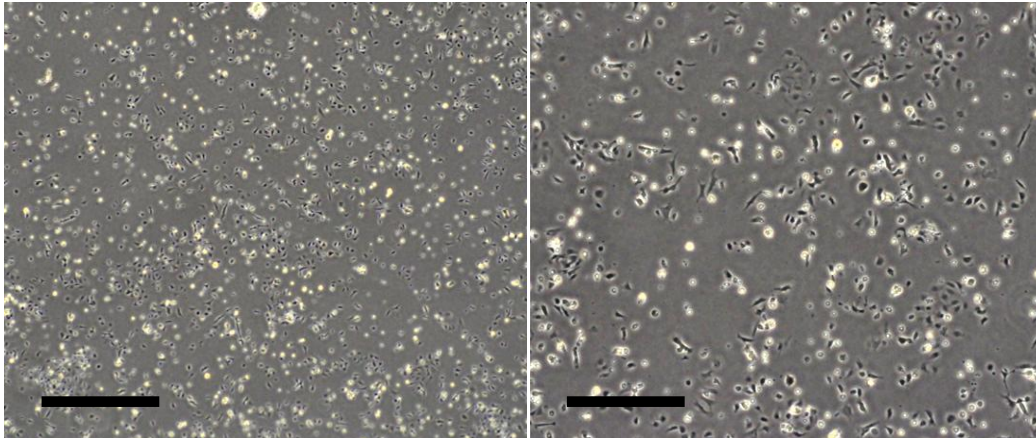

226

227 **C**

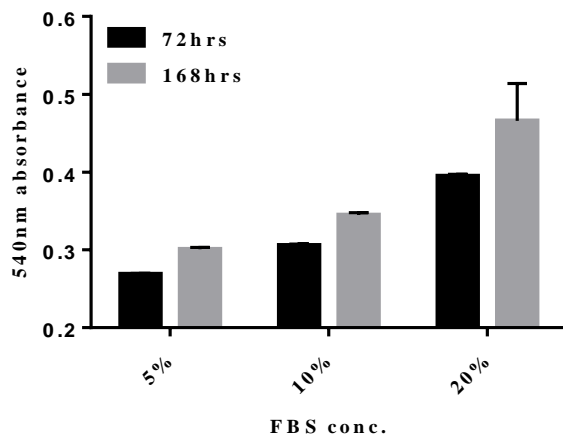

228

229 **Figure 1A shows a representative micrograph of primary GEC monolayer at 24 h post-**  
230 **seeding in L-15 medium supplemented with 20% fetal bovine serum (FBS).** The  
231 micrographs were obtained using a light microscope (Olympus microscope CKX53) at  
232 100x(1A) and 200x(1B) magnification. Bar = 500 $\mu$ m.

233 Figure 1C: Primary GEC viability was measured using a CellTiter AQuous one solution  
234 reagent (promega) (N= 5) at post-seed 72hrs and 168hrs to show the viability and growth  
235 rate.

236 **2.**  
237 **A**

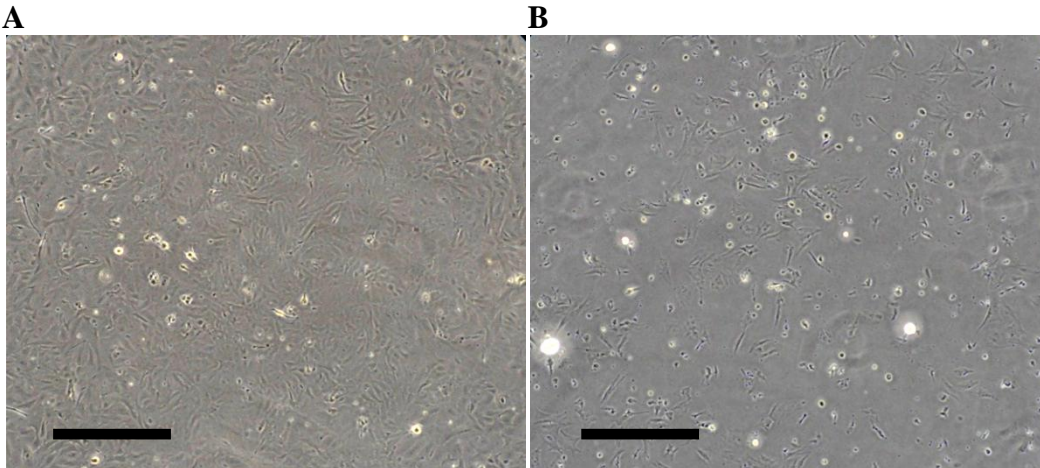

238 **Figure 2 shows primary gill epithelial cells (GECs) monolayer generated from Olive**  
239 **flounder.** Figure 2B shows development of cytopathic effect (CPE) 96 h post inoculation  
240 (hpi) of VHSV characterized by cell death. Figures 2A shows a none-infected GEC control.  
241 Micrographs were obtained using a light microscope (Olympus CKX53) at 100x  
242 magnification. Bar = 500µm.

244 **3.**

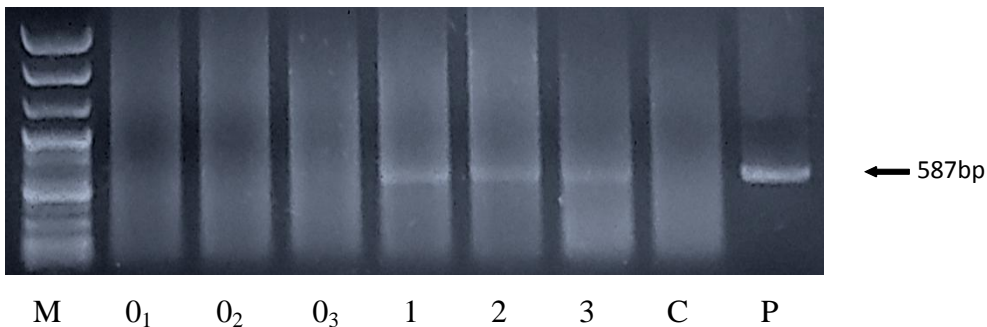

245  
246 **Figure 3: Virus replication was confirmed by RT-PCR using supernatants from GEC at**  
247 **96hrs of incubation (MOI=1).** 100bp DNA ladder maker (geneall): 'M'; Post-infection 0hrs:  
248 '0<sub>1</sub>,0<sub>2</sub>,0<sub>3</sub>'; Post-infection 96hrs: '1,2,3' ; Control (not viral infected): 'C' ; Positive control:  
249 'P'  
250
